# Quantitative trait locus mapping for common scab resistance in a tetraploid potato full-sib population

1 **Guilherme da Silva Pereira**<sup>1\*</sup>, **Marcelo Mollinari**<sup>2,3</sup>, **Xinshun Qu**<sup>4</sup>, **Christian Thill**<sup>5†</sup>, **Zhao-Bang**  
2 **Zeng**<sup>2,3</sup>, **Kathleen Haynes**<sup>6</sup>, **G. Craig Yencho**<sup>2</sup>

3 <sup>1</sup>International Potato Center, Nairobi, Kenya

4 <sup>2</sup>Department of Horticultural Science, North Carolina State University, Raleigh, NC 27695, USA

5 <sup>3</sup>Bioinformatics Research Center, North Carolina State University, Raleigh, NC 27695, USA

6 <sup>4</sup>Department of Plant Pathology and Environmental Microbiology, The Pennsylvania State  
7 University, University Park, PA 16802, USA

8 <sup>5</sup>Department of Horticultural Science, University of Minnesota, St. Paul, MN 55108, USA

9 <sup>6</sup>Genetic Improvement of Fruits and Vegetables Laboratory, USDA-ARS, Beltsville, MD 20705,  
10 USA

11 **\*Correspondence:**

12 Guilherme da Silva Pereira

13 G.Pereira@cgiar.org

14 †Christian Thill passed away in 2014. This paper is dedicated to his memory.

15 **Keywords:** *Streptomyces* spp., *Solanum tuberosum*, Polyploid QTL model, Disease resistance,  
16 Single nucleotide polymorphism

17 **Running title:** Common scab in tetraploid potato

18 **Abstract**

19 Despite the negative impact of common scab (*Streptomyces* spp.) to the potato industry, little is  
20 known about the genetic architecture of resistance to this bacterial disease in the crop. We evaluated  
21 a mapping population (~150 full-sibs) derived from a cross between two tetraploid potatoes  
22 ('Atlantic' × B1829-5) in three environments (MN11, PA11, ME12) under natural common scab  
23 pressure. Three measures to common scab reaction were assessed, namely percentage of scabby  
24 tubers, and disease area and lesion indices, which were highly correlated (>0.76). Due to large

25 environmental effect, heritability values were zero for all three traits in MN11, but moderate to high  
26 in PA11 and ME12 (0.44~0.79). We identified a single quantitative trait locus (QTL) for lesion index  
27 in PA11, ME12 and joint analyses on linkage group 3, explaining 22~30% of the total variation. The  
28 identification of QTL haplotypes and candidate genes contributing to disease resistance can support  
29 genomics-assisted breeding approaches.

## 30 **1 Introduction**

31 Common scab of potato (*Solanum tuberosum* L.) is an economically important disease that occurs  
32 worldwide. It is caused by pathogenic soil-borne bacteria belonging to several species in the genus  
33 *Streptomyces* (Loria et al., 1995; Wanner, 2009). Common scab is characterized by brownish  
34 superficial, raised or pitted lesions on tuber surfaces as a consequence of the phytotoxin thaxtomin A  
35 produced by pathogenic *Streptomyces* spp. (Loria et al., 1995; Kinkel et al., 1998). This disease is  
36 highly influenced by the environment (Haynes et al., 2010), especially by the soil conditions  
37 (Krišťufek et al., 2015), and by the virulence of the pathogens present in the soil (Wanner, 2006;  
38 Wanner and Haynes, 2009).

39 Although some management practices have been proposed to mitigate common scab damages (Dees  
40 and Wanner, 2012), there are currently no chemical or cultural management approaches that provide  
41 effective control of the disease. Breeding for varietal resistance is still being pursued as a more  
42 effective solution (Navarro et al., 2015; Braun et al., 2017b). However, the development of resistant  
43 varieties, as well as the study of the genetic architecture of resistance in potato, is quite challenging.  
44 Despite scab symptoms exhibiting a quantitative distribution (Haynes et al., 1997, 2009), scab  
45 resistance has been postulated as of oligogenic nature, with a dominant and a recessive locus  
46 (Murphy et al., 1995). Due to the autotetraploidy of potato ( $2n = 4x = 48$ ), such a recessive locus  
47 would have to appear as in a quadruplex recessive state, which is not easy to achieve using  
48 conventional breeding (Bradshaw, 2017). In this sense, marker-assisted selection (MAS) could  
49 facilitate recessive allele introgression (Bethke et al., 2019).

50 Recent developments in genomics and bioinformatics tools have allowed most technical difficulties  
51 to be overcome when studying the genetic architecture of a trait in autopolyploid crops. For potato,  
52 strategies based on genotyping-by-sequencing (Uitdewilligen et al., 2013; Sverrisdóttir et al., 2017)  
53 or chip arrays (Felcher et al., 2012; Vos et al., 2015) can now provide allele intensity information of  
54 thousands of single nucleotide polymorphisms (SNPs). After dosage calling is carried out (Schmitz

55 Carley et al., 2017; Zych et al., 2019), these variants can be ultimately utilized in several applications  
56 such as linkage and quantitative trait locus (QTL) analyses (Hackett et al., 2014; Chen et al., 2018;  
57 Pereira et al., 2020b), genome-wide association studies (GWAS; Rosyara et al., 2016; Yuan et al.,  
58 2019), or genomic-assisted prediction (Sverrisdóttir et al., 2017; Enciso-Rodriguez et al., 2018). In  
59 the case of QTL identification of resistance to common scab in potato, only two studies have been  
60 carried out, one in a tetraploid population (227 F<sub>1</sub> clones; Bradshaw et al., 2008), and another in a  
61 diploid population (49~91 F<sub>2</sub> clones; Braun et al., 2017a). In addition, GWAS was performed in a  
62 tetraploid diversity panel (143 clones; Yuan et al., 2019).

63 In order to expand the understanding of the genetic control of common scab resistance in tetraploid  
64 potatoes, we evaluated a full-sib population with ~150 clones in three environments where common  
65 scab is of natural occurrence. A recently developed integrated genetic map based on a dosage-  
66 sensitive SNP chip array (Pereira et al., 2020b) was used for QTL mapping, and helped us to estimate  
67 haplotype-specific additive effects and to pinpoint candidate genes in the *S. tuberosum* genome that  
68 could potentially help breeders in deploying MAS for common scab in potato.

## 69 **2 Material and Methods**

### 70 **2.1 F<sub>1</sub> population and field trials**

71 A mapping population named B2721, initially composed by 156 full-sibs, was derived from a cross  
72 between ‘Atlantic’ and B1829-5, and it was previously analyzed regarding its segregation to internal  
73 heat necrosis and several yield- and quality-related traits (McCord et al., 2011; Schumann et al.,  
74 2017; Pereira et al., 2020b). ‘Atlantic’ is a widely grown chipping variety in the USA, whereas  
75 B1829-5 is an advanced round white clone from the USDA-ARS Beltsville potato breeding program.  
76 Although both parents have shown susceptibility to common scab, B1829-5 was found to be less  
77 susceptible than ‘Atlantic’.

78 The B2721 was evaluated at three locations (hereafter also referred to as environments) in Becker,  
79 Minnesota in 2011 (MN11), in Pennsylvania Furnace, Pennsylvania in 2011 (PA11), and in Presque  
80 Isle, Maine in 2012 (ME12) in fields with a history of common scab pressure. In each location, the  
81 experimental design consisted of a randomized complete block with two replications, with four hills  
82 per plot. A total of 153 full-sibs were evaluated across locations, where MN11 included 146 full-sibs  
83 plus one check (B1829-5), PA11 included 151 full-sibs plus two checks (‘Atlantic’ and B1829-5),  
84 and ME12 included 139 full-sibs plus six checks (B1829-5, ‘Atlantic’, ‘Green Mountain’, ‘Ontario’,

85 ‘Russet Burbank’ and ‘Superior’). All trials were carried out from early June (7~12) to late  
86 September (19~26) of their respective years. Standard crop management practices for the respective  
87 locations were followed.

88 All tubers were collected and visually assessed per plot for three traits of interest. First, the  
89 percentage of tubers with scab lesions in each plot (PS). Second, the tubers were rated for percentage  
90 of surface area covered by lesions (1 = <2% surface area; 2 = 2.1~5%; 3 = 5.1~10%; 4 = 10.1~25%;  
91 5 = 25.1~50%; 6 = >50%) following Merz scale (Merz, 2000), which was then converted to an area  
92 index (AI) as the sum of the individual tuber ratings of surface area infected divided by six times the  
93 number of tubers (Goth et al., 1993). Third, the tubers were also rated for type of lesion (0 = no  
94 lesions; 1 = superficial discrete; 2 = coalescing superficial; 3 = raised discrete; 4 = raised coalescing;  
95 5 = pitted discrete and coalescing) following James (1971), which was then converted to a lesion  
96 index (LI) as the sum of the individual tuber ratings of lesion type divided by six times the number of  
97 tubers (Goth et al., 1993). The average number of tubers scored per plot was 30 in MN11, 24 in  
98 PA11, 21 in ME12.

## 99 2.2 Phenotypic analyses

100 Adjusted means were obtained based on a two-stage analysis approach using ASReml-R package v.  
101 4.1.0 (Butler et al., 2018) and its restricted maximum likelihood (REML) estimation algorithm. In the  
102 first stage, phenotypic data was fitted for each separate environment using the model  $y_{ij} = \mu + b_j +$   
103  $g_i + \varepsilon_{ij}$ , where  $y_{ij}$  is the phenotypic value of individual  $i$  in block  $j$ ,  $\mu$  is the intercept,  $b_j$  is the fixed  
104 effect of block  $j$  ( $j = 1, \dots, J; J = 2$ ),  $g_i$  is the fixed effect of individual  $i$  ( $i = 1, \dots, n; n = n_g + n_c$   
105 with  $n_g = 139, 146$  or  $151$  full-sibs, and  $n_c = 1, 2$  or  $6$  checks depending on the environment), and  
106  $\varepsilon_{ij}$  is the random effect of the residual error with  $\varepsilon_{ij} \sim N(0, \sigma^2)$ .

107 In the second stage, both adjusted means and weights derived from the diagonal of the variance-  
108 covariance inverse matrix from each first-stage model (Method 4 of Möhring and Piepho, 2009) were  
109 used to fit the model  $\mu_{ik} = \phi + g_i + e_k + ge_{ik} + \epsilon_{ik}$ , where  $\mu_{ik}$  is the adjusted mean of individual  $i$   
110 in environment  $k$  from the first-stage model,  $\phi$  is the intercept,  $g_i$  is the fixed effect of individual  $i$   
111 ( $i = 1, \dots, n$ ),  $e_k$  is the random effect of environment  $k$  ( $k = 1, \dots, K; K = 3$ ) with  $e_k \sim N(0, \sigma_e^2)$ ,  
112  $ge_{ik}$  is the random effect of genotype-by-environment interaction with  $ge_{ik} \sim N(0, \sigma_{ge}^2)$ , and  $\epsilon_{ik}$  is  
113 the random effect of the residual error as a function of the weights from the first-stage model.

114 Approximate broad-sense heritability values were calculated using  $H^2 = 1 - PEV/\sigma_G^2$  (Cullis et al.,  
115 2006; Isik et al., 2017, p. 223), where  $PEV$  is the best linear unbiased prediction error variance, and  
116  $\sigma_G^2$  is the genetic variance associated with  $g_i$  when full-sib genotypes were treated as random in the  
117 two previous models, i.e.  $g_i \sim N(0, \sigma_G^2)$ . Pearson's correlations were estimated between pairs of  
118 adjusted means derived from the first- and second-stage models using Hmisc R package v. 4.3-0  
119 (Harrel Jr, 2019), correlograms were plotted using ggcorrplot2 R package v. 0.1.0 (Cai, 2019), and  
120 the remaining plots were obtained using ggplot2 R package v. 3.3.2 (Wickham, 2016).

### 121 2.3 Linkage mapping and QTL analyses

122 An integrated, fully phased genetic map was constructed using MAPpoly R package v. 0.1.0  
123 (Mollinari et al., 2020) by Pereira et al. (2020b). This map is 1,630-centiMorgan (cM) long,  
124 comprises the 12 *S. tuberosum* base chromosomes, and contains 4,285 single nucleotide  
125 polymorphisms (SNPs) derived from the Illumina Infinium<sup>®</sup> 8,303 Potato Array (Felcher et al.,  
126 2012). Genotype conditional probabilities were computed every cM using a hidden Markov model  
127 adapted to autopolyploids (Mollinari and Garcia, 2019), and ultimately employed in the QTL  
128 analyses.

129 For each trait, we used a random-effect multiple interval mapping (REMIM) model implemented in  
130 QTLpoly R package v. 0.2.1 (Pereira et al., 2020a) for QTL detection using the adjusted means  
131 derived from the phenotypic analyses. Variance components associated with putative QTL were  
132 tested using score statistics, whose  $P$ -values were compared to a genome-wide significance ( $\alpha$ )  
133 assessed via score-based resampling method (Zou et al., 2004). In short, QTL were added (forward  
134 search) to a random-effect model using a more relaxed genome-wide significance level ( $\alpha = 0.20$ ).  
135 Then, QTL already in the model were re-evaluated under a more stringent significance level ( $\alpha =$   
136 0.05) and excluded (backward elimination) if not significant. These steps were repeated under the  
137 more stringent significance level ( $\alpha = 0.05$ ), and the forward-backward algorithm was stopped once  
138 no more QTL were either added to or excluded from the model. Putative QTL were tested every cM  
139 position along the B2721 genetic map, and a 20-cM window on each side of QTL already in the  
140 model was avoided when searching for another QTL. The genotypic values derived from the final  
141 QTL model were used to compute additive allele effects (Pereira et al., 2020a).

## 142 3 Results

143 The reaction to common scab in the B2721 mapping population was evaluated across three  
144 environments, and the raw phenotypic data, as well as the adjusted means and weights, are made  
145 available in the Supplementary File S1.

146 All three evaluated traits showed broad phenotypic value ranges, with several full-sib clones showing  
147 transgressive segregation, i.e. being more resistant or more susceptible when compared to parental  
148 means (Table 1). Although similar ranges were observed for all evaluated traits across environments,  
149 reaction to common scab in PA11 and ME12 were skewed towards more severe phenotypes, whereas  
150 MN11 behaved in the opposite direction, hence towards resistance (Figure 1a-c). In fact, the mapping  
151 population mean of percentage of scabby tubers (PS) was only 18.88% in MN11, but 91.64% and  
152 81.15% in PA11 and ME12, respectively (Table 1). Similar trends were observed for area index (AI),  
153 with 0.07 in MN11, but 0.27 and 0.31 in PA11 and ME12, and lesion index (LI), with 0.13 in MN11,  
154 but 0.60 and 0.64 in PA11 and ME12. The common check, B1829-5, also performed very  
155 inconsistently across locations, showing 95.22% and 85.00% of scabby tubers in PA11 and ME12,  
156 respectively, but only 3.85% in MN11. Variation for these traits in MN11 could not be attributed to  
157 genetics, as evidenced by their null heritability estimates. In PA11 and ME12, the heritability values  
158 were 0.53 and 0.72 for PS, 0.48 and 0.70 for AI, and 0.78 and 0.79 for LI, respectively. For the joint  
159 model, the respective heritability values for PS, AI and LI were 0.48, 0.44 and 0.67 (Table 1).

160 The correlation among separately adjusted means for different environments can be observed in  
161 Figure 1d-f. Between PA11 and ME12 means, the correlations were positive and moderate for PS  
162 (0.42), AI (0.38) and LI (0.68), but low between these environments and MN11 (0.05~0.20). The  
163 lack of consistency in the individual ranking across environments can be visualized in Figure 1a-c,  
164 especially in relation to MN11, implying strong genotype-by-environment interaction. The  
165 correlation estimates between the jointly adjusted means with the PA11 and ME12 means were high  
166 (0.77~0.90), and with MN11 were moderate (0.34~0.40). As these three environments were under  
167 natural common scab pressure, meaning that no inoculum was artificially applied to the clones, we  
168 believe that in MN11 certain environmental conditions, including availability of less pathogenic  
169 *Streptomyces* spp. or strains, did not allow the disease to progress as much as in PA11 and ME12.  
170 Although MN11 had little to offer for genetic analysis purposes, the adjusted means derived from this  
171 environment were carried along with the analysis as a sort of negative control for QTL mapping.

172 We also compared the correlation among traits using their jointly adjusted means (Figure 2). We  
173 observed that the traits were highly, positively correlated (0.76~0.83). This is likely related to the

174 progression of the disease, such that in a susceptible genotype, more scabby tubers resulted in  
175 broader areas covered by scab-like lesions, which in turn appeared to be more severe. Despite the  
176 high correlation, we were able to identify QTL only for LI. QTL mapping models were fitted using  
177 separately and jointly adjusted means derived from the phenotypic analyses. The QTL for LI was co-  
178 localized on linkage group 3 at 99 cM for PA11, ME12 and jointly adjusted means, but no QTL was  
179 found for MN11 (Figure 3a). This QTL explained as much as 30.1% of the trait variation in PA11.  
180 For ME12 and jointly adjusted means, the QTL heritability was 22.5% and 25.4%, respectively  
181 (Table 2). The significance of the score statistics ( $P$ -values) ranged from  $4.17E-05$  (ME12) to  $1.05E-$   
182  $06$  (PA11).

183 The QTL allele contributions for LI were relatively consistent among PA11, ME12 and joint analyses  
184 (Figure 3b). The parent B1829-5 showed more pronounced additive effects, with haplotype *e*  
185 contributing to increasing (+0.0583) and haplotype *f* contributing to decreasing ( $-0.0476$ ) the mean  
186 ( $0.587$ ) LI in PA11. In this case, in addition to haplotype *f*, one would have to select haplotype *g*  
187 from B1829-5, and haplotypes *a* and *c* from ‘Atlantic’ in order to potentially drive LI down.

188 The SNP markers at ~95% support interval boundaries of the QTL in PA11 (96~103 cM) were  
189 *solcap\_snp\_c2\_1830* (ST4.03ch3:51731168) and *solcap\_snp\_c1\_7076* (ST4.03ch3:54368685). This  
190 region spanned 2,637,517 bp (4.23%) of the chromosome 3 of the *S. tuberosum* v. 4.03 reference  
191 genome (Sharma et al., 2013), and contained 263 genes (Supplementary File S2). The closest  
192 markers on the left and on the right of the QTL peak were *solcap\_snp\_c2\_57263*  
193 (ST4.03ch3:53439319) and *solcap\_snp\_c1\_5812* (ST04.03ch3:53665337), respectively, and spanned  
194 226,018 bp; this region contained 23 genes.

#### 195 **4 Discussion**

196 While both B2721 parents and most of the full-sibs are highly susceptible to common scab for two  
197 environments, namely PA11 and ME12, the absence of more severe symptoms in MN11 can be  
198 attributed to a strong genotype-by-environment interaction. The variation observed in this  
199 environment is hence due to non-genetic, environmental effects. For all traits, the lack of correlation  
200 between MN11 and the other two environments confirms such a divergent pattern. This also explains  
201 how there was no evidence for QTL in the same region as for PA11 and ME12, where common scab  
202 was relatively more severe. That is, in order to map QTL for resistance to a disease, the environment  
203 pathogen pressure should be such that the genotypes can express their genetic merit and be  
204 phenotypically evaluated. In the case of potato common scab, the variation present within pathogenic

205 *Streptomyces* spp., and other soil variables, such as moisture content and pH, are known to influence  
206 the severity of scab (Braun et al., 2017b). The distribution of different *Streptomyces* spp. isolates  
207 predominating in different parts of the USA (Wanner, 2009) could partially explain the lack of  
208 agreement between MN and either ME or PA.

209 Bradshaw et al. (2008), working with 227 full-sib progenies, encountered similar issues when only  
210 one out of three environments showed scorable severity for common scab, for which heritability was  
211 0.66. While studying 23 tetraploid potatoes, Haynes et al. (1997) found higher broad-sense  
212 heritability values for AI (0.89) and LI (0.93), where a rather low genotype-by-environment  
213 interaction was observed. For 370 clones evaluated over nine years, Enciso-Rodriguez et al. (2018)  
214 found low genotype-by-year interaction and a genomic heritability estimate of 0.45 for common scab  
215 scoring. In another study involving diploid potatoes, where lesion type and percentage of surface area  
216 was scored for common scab over three years, Braun et al. (2017b) found heritability values ranging  
217 from 0.48 to 0.79. Finally, in a diversity panel with 148 clones, heritability was estimated as 0.81 for  
218 a three-year evaluation data (Yuan et al., 2019). Therefore, except for the null heritabilities resulting  
219 from MN11, our estimates (0.44~0.79) were in relative agreement with those found in literature.

220 Some genomic regions have been found to be associated to common scab resistance, but none on  
221 chromosome 3 as identified in the present study. Previous QTL mapping studies in tetraploid  
222 (Bradshaw et al., 2008) or diploid (Braun et al., 2017a) populations found two (on homology groups  
223 II and IV) or one QTL (on chromosome 11), respectively. Using GWAS, Yuan et al. (2019) found  
224 associations on chromosomes 2, 4, and 12. Modernly, molecular breeding has been taking advantage  
225 of the high-density markers covering the whole genome to perform selection based on genomic  
226 estimated breeding values. For potato common scab, such genomic-assisted prediction models have  
227 shown prediction accuracies as high as 0.278, and a SNP with major effect on chromosome 9  
228 (Enciso-Rodriguez et al., 2018). Haplotypic and QTL information, such as that provided here, can be  
229 used to leverage genomic-assisted prediction models in order to deliver higher predictive abilities,  
230 notably for less complex traits (Gemenet et al., 2020).

231 At least, three out of the 23 genes located within the QTL marker interval were previously implicated  
232 in plant responses to biotic stresses in signaling pathways or hypersensitive responses, namely MYB  
233 transcription factor (PGSC0003DMT400063172, ~53.60 Mbp) (Ambawat et al., 2013), calcium-  
234 dependent protein kinase 1 (CDPK1; PGSC0003DMT400034291, ~53.43 Mbp) (Lee and Rudd,  
235 2002), and ubiquitin-protein ligase (PGSC0003DMT400092368, ~53.59 Mbp) (Craig et al., 2009;



236 Duplan and Rivas, 2014). In addition, there were several other genes among the remaining 240  
237 transcripts retrieved from the ~95% QTL support interval that were known for encoding proteins  
238 involved in plant defense, such as receptor-like kinase (PGSC0003DMT400046807, ~52.47 Mbp;  
239 PGSC0003DMT400046778, ~52.57 Mbp) (Nazarian-Firouzabadi et al., 2019), proteins containing  
240 nucleotide binding-ARC domain (PGSC0003DMT400087730, ~52.37 Mbp) and leucine-rich repeat  
241 (LRR; PGSC0003DMT400046655, ~52.18 Mbp) (Takken et al., 2006), and transcription factors such  
242 as NAC (PGSC0003DMT400097372, ~54.15 Mbp; PGSC0003DMT400096000, ~54.17 Mbp)  
243 (Nuruzzaman et al., 2013) and WRKY (PGSC0003DMT400046570, ~53.04) (Bhattarai et al., 2010;  
244 Enciso-Rodriguez et al., 2018).

245 Although the list of candidate genes is still hypothetical, several transcripts encoding related protein  
246 isoforms (e.g. MYB, WRKY, LRR receptor-like serine/threonine-protein kinase) were found to be  
247 differentially expressed between the resistant ‘Hindenburg’ and susceptible ‘Green Mountain’  
248 cultivars inoculated with *S. scabies* (Fofana et al., 2020). Here, we detected a single QTL consistently  
249 in two out of three environments, that explains up to 30% of the variation for lesion index. In order to  
250 effectively apply genes and haplotypes in breeding, the QTL identified in this study needs to be  
251 further investigated in a more diverse genetic background. If an oligogenic-like inheritance confirms  
252 and upon QTL validation, specific markers to retrieve the haplotypes conferring resistance to  
253 common scab can be screened in breeding populations to perform early selection (Bradshaw, 2017).  
254 Progress of MAS in potato is relatively slow when compared to diploid, inbred species, and needs to  
255 take into consideration several aspects in addition to the genetic architecture of a trait, such as  
256 polyploidy, high heterozygosity, and clonal propagation (Slater et al., 2014; Bethke et al., 2019).

## 257 **5 Conflict of Interest**

258 The authors declare that the research was conducted in the absence of any commercial or financial  
259 relationships that could be construed as a potential conflict of interest.

## 260 **6 Author Contributions**

261 KH designed the experiments and supervised the project. KH, XQ and CT performed field  
262 experiments and collected phenotypic data. CY provided genotypic data. GSP analyzed data and  
263 drafted the manuscript. MM and ZBZ supervised data analyses. All authors reviewed and approved  
264 the manuscript.

## 265 **7 Funding**

266 GSP and MM work on QTLpoly and MAPpoly has been funded by Bill & Melinda Gates Foundation  
267 [OPP1052983, OPP1213329].

## 268 **8 Data Availability Statement**

269 The phenotypic data analyzed for this study can be found as Supplementary Material. The genotypic  
270 data and linkage map information are available at [https://github.com/mmollina/B2721\\_map](https://github.com/mmollina/B2721_map) (Pereira  
271 et al., 2020b). MAPpoly (<https://github.com/mmollina/mappoly>) and QTLpoly  
272 (<https://github.com/guilherme-pereira/QTLpoly>) source codes are available at their respective GitHub  
273 pages.

## 274 **9 Supplementary Material**

275 Supplementary File S1. Raw phenotypic data, adjusted means and weights from phenotypic analyses.  
276 (XLSX)

277 Supplementary File S2. List of annotated genes within the ~95% support interval for the QTL for  
278 lesion index (LI) in PA11. (XLSX)

## 279 **10 Conflict of Interest Statement**

280 The authors declare that the research was conducted in the absence of any commercial or financial  
281 relationships that could be construed as a potential conflict of interest.

## 282 **11 References**

283 Ambawat, S., Sharma, P., Yadav, N. R., and Yadav, R. C. (2013). MYB transcription factor genes as  
284 regulators for plant responses: An overview. *Physiol. Mol. Biol. Plants* 19, 307–321.  
285 doi:10.1007/s12298-013-0179-1.

286 Bethke, P. C., Halterman, D. A., and Jansky, S. H. (2019). Potato Germplasm Enhancement Enters  
287 the Genomics Era. *Agronomy* 9, 575. doi:10.3390/agronomy9100575.

288 Bhattarai, K. K., Atamian, H. S., Kaloshian, I., and Eulgem, T. (2010). WRKY72-type transcription  
289 factors contribute to basal immunity in tomato and Arabidopsis as well as gene-for-gene  
290 resistance mediated by the tomato R gene Mi-1. *Plant J.* 63, 229–240. doi:10.1111/j.1365-

- 291 313X.2010.04232.x.
- 292 Bradshaw, J. E. (2017). Review and Analysis of Limitations in Ways to Improve Conventional  
293 Potato Breeding. *Potato Res.* 60, 171–193. doi:10.1007/s11540-017-9346-z.
- 294 Bradshaw, J. E., Hackett, C. A., Pande, B., Waugh, R., and Bryan, G. J. (2008). QTL mapping of  
295 yield, agronomic and quality traits in tetraploid potato (*Solanum tuberosum* subsp. *tuberosum*).  
296 *Theor. Appl. Genet.* 116, 193–211. doi:10.1007/s00122-007-0659-1.
- 297 Braun, S. R., Endelman, J. B., Haynes, K. G., and Jansky, S. H. (2017a). Quantitative Trait Loci for  
298 Resistance to Common Scab and Cold-Induced Sweetening in Diploid Potato. *Plant Genome* 10,  
299 1–9. doi:10.3835/plantgenome2016.10.0110.
- 300 Braun, S. R., Gevens, A., Charkowski, A., Allen, C., and Jansky, S. (2017b). Potato Common Scab: a  
301 Review of the Causal Pathogens, Management Practices, Varietal Resistance Screening  
302 Methods, and Host Resistance. *Am. J. Potato Res.* 94, 283–296. doi:10.1007/s12230-017-9575-  
303 3.
- 304 Butler, D. G., Cullis, B. R., Gilmour, A. R., Gogel, B. J., and Thompson, R. (2018). *ASReml-R*  
305 *Reference Manual Version 4*. Hemel Hempstead.
- 306 Cai, J. (2019). ggcorrplot2: Visualize a Correlation Matrix using ggplot2 v. 0.1.0.
- 307 Chen, J., Zhang, F., Wang, L., Leach, L., and Luo, Z. (2018). Orthogonal contrast based models for  
308 quantitative genetic analysis in autotetraploid species. *New Phytol.* 220, 332–346.  
309 doi:10.1111/nph.15284.
- 310 Craig, A., Ewan, R., Mesmar, J., Gudipati, V., and Sadanandom, A. (2009). E3 ubiquitin ligases and  
311 plant innate immunity. *J. Exp. Bot.* 60, 1123–1132. doi:10.1093/jxb/erp059.
- 312 Cullis, B. R., Smith, A. B., and Coombes, N. E. (2006). On the design of early generation variety  
313 trials with correlated data. *J. Agric. Biol. Environ. Stat.* 11, 381–393.  
314 doi:10.1198/108571106X154443.
- 315 Dees, M. W., and Wanner, L. A. (2012). In Search of Better Management of Potato Common Scab.  
316 *Potato Res.* 55, 249–268. doi:10.1007/s11540-012-9206-9.

- 317 Duplan, V., and Rivas, S. (2014). E3 ubiquitin-ligases and their target proteins during the regulation  
318 of plant innate immunity. *Front. Plant Sci.* 5, 42. doi:10.3389/fpls.2014.00042.
- 319 Enciso-Rodriguez, F., Douches, D., Lopez-Cruz, M., Coombs, J., and de los Campos, G. (2018).  
320 Genomic Selection for Late Blight and Common Scab Resistance in Tetraploid Potato (*Solanum*  
321 *tuberosum*). *G3 Genes/Genomes/Genetics* 8, 2471–2481. doi:10.1534/g3.118.200273.
- 322 Felcher, K. J., Coombs, J. J., Massa, A. N., Hansey, C. N., Hamilton, J. P., Veilleux, R. E., et al.  
323 (2012). Integration of two diploid potato linkage maps with the potato genome sequence. *PLoS*  
324 *One* 7, e36347. doi:10.1371/journal.pone.0036347.
- 325 Fofana, B., Somalraju, A., Fillmore, S., Zaidi, M., Main, D., and Ghose, K. (2020). Comparative  
326 transcriptome expression analysis in susceptible and resistant potato (*Solanum tuberosum*)  
327 cultivars to common scab (*Streptomyces scabies*) revealed immune priming responses in the  
328 incompatible interaction. *PLoS One* 15, e0235018. doi:10.1371/journal.pone.0235018.
- 329 Gemenet, D., Lindqvist-Kreuze, H., Olukolu, B. A., De Boeck, B., da Silva Pereira, G., Mollinari,  
330 M., et al. (2020). Sequencing depth and genotype quality: Accuracy and breeding operation  
331 considerations for genomic selection applications in autopolyploid crops. *Theor. Appl. Genet.*,  
332 Early online. doi:10.1101/2020.02.23.961383.
- 333 Goth, R. W., Haynes, K. G., and Wilson, D. R. (1993). Evaluation and characterization of advanced  
334 potato breeding clones for resistance to scab by cluster analysis. *Plant Dis.* 77, 911–914.
- 335 Hackett, C. A., Bradshaw, J. E., and Bryan, G. J. (2014). QTL mapping in autotetraploids using SNP  
336 dosage information. *Theor. Appl. Genet.* 127, 1885–1904. doi:10.1007/s00122-014-2347-2.
- 337 Harrel Jr, F. E. (2019). Hmisc: Harrell Miscellaneous v. 4.3-0.
- 338 Haynes, K. G., Christ, B. J., Burkhart, C. R., and Vinyard, B. T. (2009). Heritability of resistance to  
339 common scab in diploid potatoes. *Am. J. Potato Res.* 86, 165–170. doi:10.1007/s12230-009-  
340 9068-0.
- 341 Haynes, K. G., Goth, R. W., and Young, R. J. (1997). Genotype x environment interactions for  
342 resistance to common scab in tetraploid potato. *Crop Sci.* 37, 1163–1167.  
343 doi:10.2135/cropsci1997.0011183X003700040023x.

- 344 Haynes, K. G., Wanner, L. A., Thill, C. A., Bradeen, J. M., Miller, J., Novy, R. G., et al. (2010).  
345 Common scab trials of potato varieties and advanced selections at three U.S. locations. *Am. J.*  
346 *Potato Res.* 87, 261–276. doi:10.1007/s12230-010-9132-9.
- 347 Isik, F., Holland, J., and Maltecca, C. (2017). *Genetic Data Analysis for Plant and Animal Breeding*.  
348 Springer doi:10.1007/978-3-319-55177-7.
- 349 James, C. (1971). *Manual of assessment keys for plant diseases*. Canadian Department of  
350 Agriculture.
- 351 Kinkel, L. L., Bowers, J. H., Shimizu, K., Neeno-Eckwall, E. C., and Schottel, J. L. (1998).  
352 Quantitative relationships among thaxtomin A production, potato scab severity, and fatty acid  
353 composition in *Streptomyces*. *Can. J. Microbiol.* 44, 768–776. doi:10.1139/w98-061.
- 354 Křišťufek, V., Diviš, J., Omelka, M., Kopecký, J., and Sagová-Marečková, M. (2015). Site, Year and  
355 Cultivar Effects on Relationships Between Periderm Nutrient Contents and Common Scab  
356 Severity. *Am. J. Potato Res.* 92, 473–482. doi:10.1007/s12230-015-9456-6.
- 357 Lee, J., and Rudd, J. J. (2002). Calcium-dependent protein kinases: versatile plant signalling  
358 components necessary for pathogen defence. *Trends Plant Sci.* 7, 97–98. doi:10.1016/S1360-  
359 1385(02)02229-X.
- 360 Loria, R., Bukhalid, R. A., Creath, R. A., Leiner, R. H., Olivier, M., and Steffens, J. C. (1995).  
361 Differential Production of Thaxtomins by Pathogenic *Streptomyces* Species In Vitro.  
362 *Phytopathology* 85, 537–541. doi:10.1094/Phyto-85-537.
- 363 McCord, P. H., Sosinski, B. R., Haynes, K. G., Clough, M. E., and Yenko, G. C. (2011). Linkage  
364 mapping and QTL analysis of agronomic traits in tetraploid potato (*Solanum tuberosum* subsp.  
365 *tuberosum*). *Crop Sci.* 51, 771–785. doi:10.2135/cropsci2010.02.0108.
- 366 Merz, U. (2000). Powdery scab. Research in Switzerland. in *Proceedings of the first European*  
367 *Powdery Scab*, eds. U. Merz and A. K. Lees (Aberdeen, Scotland), 67–71.
- 368 Möhring, J., and Piepho, H. P. (2009). Comparison of weighting in two-stage analysis of plant  
369 breeding trials. *Crop Sci.* 49, 1977–1988. doi:10.2135/cropsci2009.02.0083.
- 370 Mollinari, M., and Garcia, A. A. F. (2019). Linkage Analysis and Haplotype Phasing in Experimental

- 371 Autopolyploid Populations with High Ploidy Level Using Hidden Markov Models. *G3*  
372 *Genes/Genomes/Genetics* 9, 3297–3314. doi:10.1534/g3.119.400378.
- 373 Mollinari, M., Olukolu, B. A., Pereira, G. S., Khan, A., Gemenet, D., Yencho, G. C., et al. (2020).  
374 Unraveling the Hexaploid Sweetpotato Inheritance Using Ultra-Dense Multilocus Mapping. *G3*  
375 *Genes/Genomes/Genetics* 10, 281–292. doi:10.1534/g3.119.400620.
- 376 Murphy, A. M., De Jong, H., and Tai, G. C. C. (1995). Transmission of resistance to common scab  
377 from the diploid to the tetraploid level via 4x-2x crosses in potatoes. *Euphytica* 82, 227–233.  
378 doi:10.1007/BF00029565.
- 379 Navarro, F. M., Rak, K. T., Banks, E., Bowen, B. D., Higgins, C., and Palta, J. P. (2015). Strategies  
380 for Selecting Stable Common Scab Resistant Clones in a Potato Breeding Program. *Am. J.*  
381 *Potato Res.* 92, 326–338. doi:10.1007/s12230-015-9435-y.
- 382 Nazarian-Firouzabadi, F., Joshi, S., Xue, H., and Kushalappa, A. C. (2019). Genome-wide in silico  
383 identification of LysM-RLK genes in potato (*Solanum tuberosum* L.). *Mol. Biol. Rep.* 46, 5005–  
384 5017. doi:10.1007/s11033-019-04951-z.
- 385 Nuruzzaman, M., Sharoni, A. M., and Kikuchi, S. (2013). Roles of NAC transcription factors in the  
386 regulation of biotic and abiotic stress responses in plants. *Front. Microbiol.* 4, 248.  
387 doi:10.3389/fmicb.2013.00248.
- 388 Pereira, G. da S., Gemenet, D. C., Mollinari, M., Olukolu, B. A., Wood, J. C., Diaz, F., et al. (2020a).  
389 Multiple QTL Mapping in Autopolyploids: A Random-Effect Model Approach with Application  
390 in a Hexaploid Sweetpotato Full-Sib Population. *Genetics* 215, 579–595.  
391 doi:10.1534/genetics.120.303080.
- 392 Pereira, G. da S., Mollinari, M., Schumann, M. J., Clough, M. E., and Yencho, C. (2020b). The  
393 recombination landscape and multiple QTL mapping in a *Solanum tuberosum* cv. ‘Atlantic’-  
394 derived F1 population. *bioRxiv*. doi:10.1101/2020.08.24.265397.
- 395 Rosyara, U. R., De Jong, W. S., Douches, D. S., and Endelman, J. B. (2016). Software for Genome-  
396 Wide Association Studies in Autopolyploids and Its Application to Potato. *Plant Genome* 9, 1–  
397 10. doi:10.3835/plantgenome2015.08.0073.

- 398 Schmitz Carley, C. A., Coombs, J. J., Douches, D. S., Bethke, P. C., Palta, J. P., Novy, R. G., et al.  
399 (2017). Automated tetraploid genotype calling by hierarchical clustering. *Theor. Appl. Genet.*  
400 130, 717–726. doi:10.1007/s00122-016-2845-5.
- 401 Schumann, M. J., Zeng, Z. B., Clough, M. E., and Yencho, G. C. (2017). Linkage map construction  
402 and QTL analysis for internal heat necrosis in autotetraploid potato. *Theor. Appl. Genet.* 130,  
403 2045–2056. doi:10.1007/s00122-017-2941-1.
- 404 Sharma, S. K., Bolser, D., de Boer, J., Sonderkaer, M., Amoros, W., Carboni, M. F., et al. (2013).  
405 Construction of reference chromosome-scale pseudomolecules for potato: integrating the potato  
406 genome with genetic and physical maps. *G3 Genes/Genomes/Genetics* 3, 2031–47.  
407 doi:10.1534/g3.113.007153.
- 408 Slater, A. T., Cogan, N. O. I., Hayes, B. J., Schultz, L., Dale, M. F. B., Bryan, G. J., et al. (2014).  
409 Improving breeding efficiency in potato using molecular and quantitative genetics. *Theor. Appl.*  
410 *Genet.* 127, 2279–2292. doi:10.1007/s00122-014-2386-8.
- 411 Sverrisdóttir, E., Byrne, S., Sundmark, E. H. R., Johnsen, H. Ø., Kirk, H. G., Asp, T., et al. (2017).  
412 Genomic prediction of starch content and chipping quality in tetraploid potato using genotyping-  
413 by-sequencing. *Theor. Appl. Genet.* 130, 2091–2108. doi:10.1007/s00122-017-2944-y.
- 414 Takken, F. L., Albrecht, M., and Tameling, W. IL (2006). Resistance proteins: molecular switches of  
415 plant defence. *Curr. Opin. Plant Biol.* 9, 383–390. doi:10.1016/j.pbi.2006.05.009.
- 416 Uitdewilligen, J. G. A. M. L., Wolters, A.-M. A., D’hoop, B. B., Borm, T. J. A., Visser, R. G. F., and  
417 van Eck, H. J. (2013). A Next-Generation Sequencing Method for Genotyping-by-Sequencing  
418 of Highly Heterozygous Autotetraploid Potato. *PLoS One* 8, e62355.  
419 doi:10.1371/journal.pone.0062355.
- 420 Vos, P. G., Uitdewilligen, J. G. A. M. L., Voorrips, R. E., Visser, R. G. F., and van Eck, H. J. (2015).  
421 Development and analysis of a 20K SNP array for potato (*Solanum tuberosum*): an insight into  
422 the breeding history. *Theor. Appl. Genet.* 128, 2387–2401. doi:10.1007/s00122-015-2593-y.
- 423 Wanner, L. A. (2006). A survey of genetic variation in *Streptomyces* isolates causing potato common  
424 scab in the United States. *Phytopathology* 96, 1363–1371. doi:10.1094/PHYTO-96-1363.

- 425 Wanner, L. A. (2009). A patchwork of *Streptomyces* species isolated from potato common scab  
426 lesions in North America. *Am. J. Potato Res.* 86, 247–264. doi:10.1007/s12230-009-9078-y.
- 427 Wanner, L. A., and Haynes, K. G. (2009). Aggressiveness of *Streptomyces* on four potato cultivars  
428 and implications for common scab resistance breeding. *Am. J. Potato Res.* 86, 335–346.  
429 doi:10.1007/s12230-009-9088-9.
- 430 Wickham, H. (2016). *ggplot2: elegant graphics for data analysis*. Springer.
- 431 Yuan, J., Bizimungu, B., De Koeyer, D., Rosyara, U., Wen, Z., and Lagüe, M. (2019). Genome-Wide  
432 Association Study of Resistance to Potato Common Scab. *Potato Res.* doi:10.1007/s11540-019-  
433 09437-w.
- 434 Zou, F., Fine, J. P., Hu, J., and Lin, D. Y. (2004). An efficient resampling method for assessing  
435 genome-wide statistical significance in mapping quantitative trait loci. *Genetics* 168, 2307–  
436 2316. doi:10.1534/genetics.104.031427.
- 437 Zych, K., Gort, G., Maliepaard, C. A., Jansen, R. C., and Voorrips, R. E. (2019). FitTetra 2.0 -  
438 Improved genotype calling for tetraploids with multiple population and parental data support.  
439 *BMC Bioinformatics* 20, 1–8. doi:10.1186/s12859-019-2703-y.



440 **12 Tables**

441 Table 1. Summary of percentage of scabby tubers (PS), area index (AI) and lesion index (LI) of  
 442 common scab reaction in the B2721 potato mapping population based on separate (MN11, PA11,  
 443 ME12) and joint analyses.

| Trait | Location | Means           |         |                | F <sub>1</sub> range | $\sigma_G^2$ <sup>b</sup> | H <sup>2c</sup> |
|-------|----------|-----------------|---------|----------------|----------------------|---------------------------|-----------------|
|       |          | 'Atlantic'      | B1829-5 | F <sub>1</sub> |                      |                           |                 |
| PS    | Joint    | 72.32           | 65.12   | 63.68          | 16.13-78.40          | 5.61E+01                  | 0.485           |
|       | MN11     | NA <sup>a</sup> | 3.85    | 18.88          | 0.00-86.93           | 4.32E-05                  | 0.000           |
|       | PA11     | 100.00          | 95.22   | 91.64          | 53.57-100.00         | 4.90E+01                  | 0.531           |
|       | ME12     | NA              | 85.00   | 81.15          | 0.00-100.00          | 2.65E+02                  | 0.724           |
| AI    | Joint    | 0.29            | 0.24    | 0.22           | 0.02-0.44            | 2.64E-03                  | 0.437           |
|       | MN11     | NA              | 0.01    | 0.07           | 0.00-0.49            | 8.11E-10                  | 0.000           |
|       | PA11     | 0.33            | 0.28    | 0.27           | 0.09-0.50            | 3.19E-03                  | 0.481           |
|       | ME12     | NA              | 0.40    | 0.31           | 0.00-0.64            | 1.48E-02                  | 0.702           |
| LI    | Joint    | 0.64            | 0.54    | 0.45           | 0.02-0.77            | 1.87E-02                  | 0.668           |
|       | MN11     | NA              | 0.01    | 0.13           | 0.00-0.74            | 2.60E-09                  | 0.000           |
|       | PA11     | 0.79            | 0.80    | 0.60           | 0.11-1.00            | 3.67E-02                  | 0.777           |
|       | ME12     | NA              | 0.72    | 0.64           | 0.00-0.98            | 3.70E-02                  | 0.791           |

<sup>a</sup>NA = not available

<sup>b</sup> $\sigma_G^2$  = genetic variance

<sup>c</sup>H<sup>2</sup> = broad-sense heritability by Cullis et al. (2006)

444

445 Table 2. QTL detected for lesion index (LI) of common scab reaction in the B2721 potato mapping  
 446 population based on separate (PA11, ME12) and joint analyses.

| Environment | LG <sup>a</sup> | Position (cM) | SI <sup>b</sup> (cM) | Score  | P-value  | Intercept | $\sigma_{QTL}^2$ <sup>c</sup> | $h_{QTL}^2$ <sup>d</sup> |
|-------------|-----------------|---------------|----------------------|--------|----------|-----------|-------------------------------|--------------------------|
| PA11        | 3               | 99            | 96-103               | 195.32 | 1.05E-06 | 0.587     | 0.0162                        | 0.301                    |
| ME12        | 3               | 99            | 43-134               | 131.90 | 4.17E-05 | 0.626     | 0.0110                        | 0.225                    |
| Joint       | 3               | 99            | 43-103               | 161.17 | 1.40E-05 | 0.446     | 0.0078                        | 0.254                    |

<sup>a</sup>LG = linkage group

<sup>b</sup>SI = ~95% support interval

<sup>c</sup> $\sigma_{QTL}^2$  = variance component associated with the QTL

<sup>d</sup> $h_{QTL}^2$  = QTL heritability

447

448 **13 Figures**

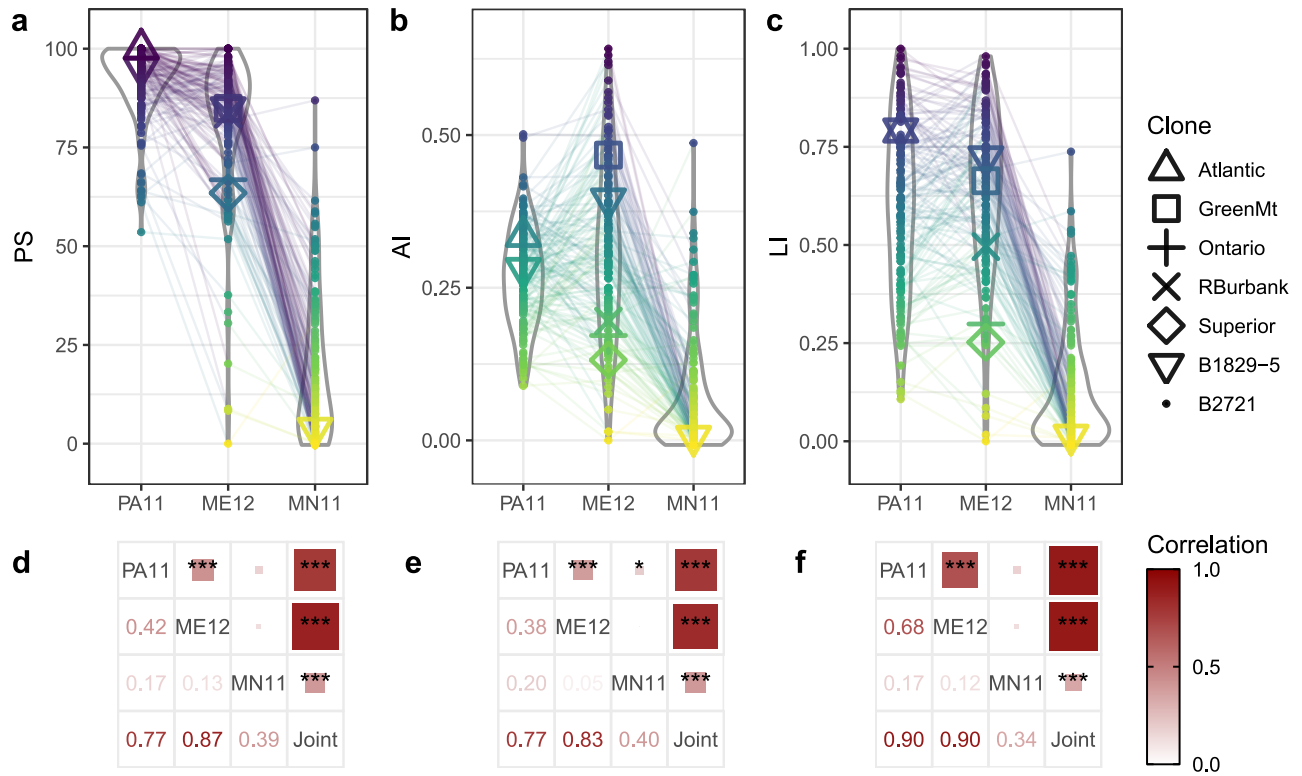

449

450 Figure 1. Violin (a-c) and correlogram (d-f) plots for percentage of scabby tubers (PS; a and d), area  
 451 index (AI; b and e) and lesion index (LI; c and f) of common scab reaction in the B2721 potato  
 452 mapping population evaluated across three environments (MN11, PA11, ME12). Symbols represent  
 453 different checks. Lines connect the same B2721 clone in consecutive environments. Correlograms  
 454 show Pearson's correlation values ( $*P < 0.05$ ,  $***P < 0.001$ ) between separately and jointly  
 455 adjusted means.

456

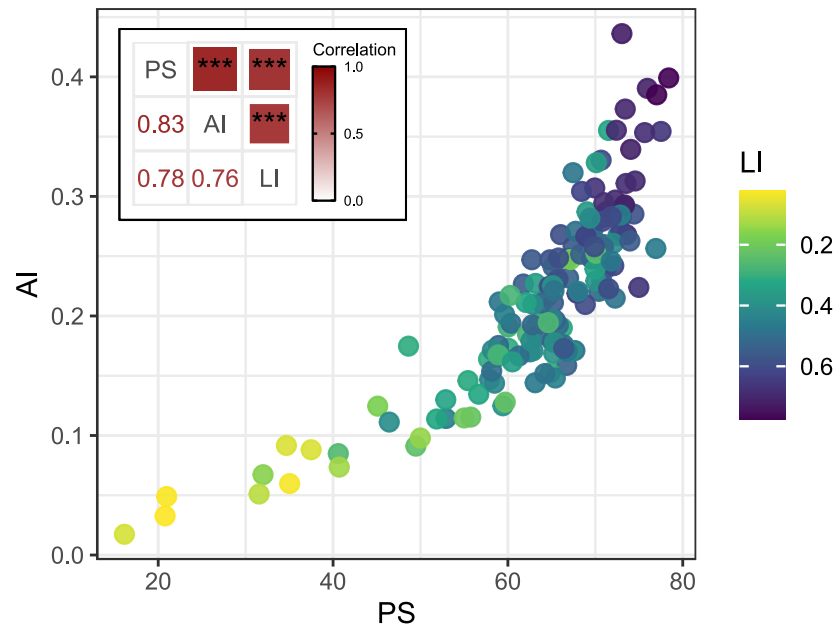

457

458 Figure 2. Scatterplot of jointly adjusted means for percentage of scabby tubers (PS), area index (AI)  
459 and lesion index (LI) of common scab reaction in the B2721 potato mapping population evaluated  
460 across three environments. Correlogram (top-left) shows Pearson's correlation values ( $***P <$   
461  $0.001$ ).

462

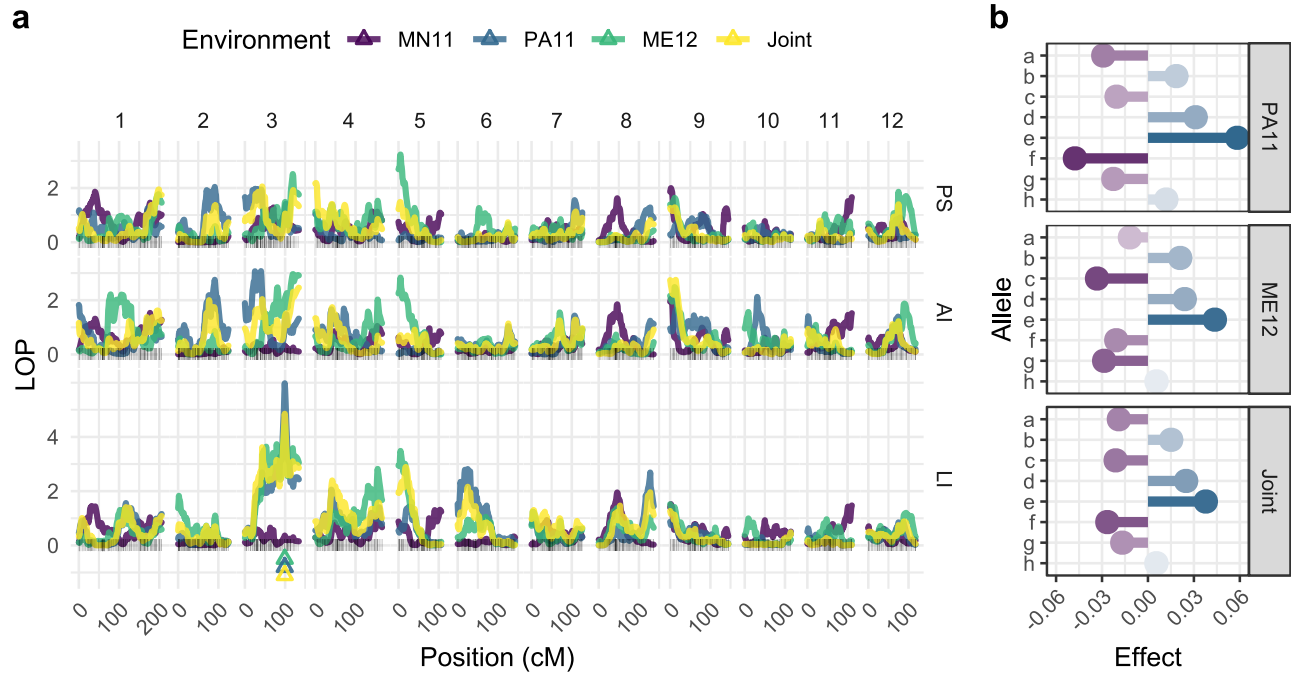

463

464 Figure 3. (a) QTL profiles for percentage of scabby tubers (PS), area index (AI) and lesion index (LI)  
 465 of common scab reaction in the B2721 potato mapping population evaluated across three  
 466 environments (MN11, PA11, ME12). “Joint” refers to the QTL analysis using the jointly adjusted  
 467 means, triangles represent the QTL peak, and  $LOP = -\log_{10}(P)$ . (b) Additive effects of the QTL on  
 468 linkage group 3 at 99 cM for LI in PA11, ME12 and Joint analyses. Parental alleles (haplotypes):  
 469 ‘Atlantic’ = *a, b, c, d*, and B1829-5 = *e, f, g, h*.

470
